# Supplementary material for: Percentage of Heavy Drinking Days Following Psilocybin-Assisted Psychotherapy vs Placebo in the Treatment of Adult Patients With Alcohol Use Disorder: A Randomized Clinical Trial
Source: PubMed Central journal article supplement (PMC9403854; doi:10.1001/jamapsychiatry.2022.2096), 2022-08-24
Supplement: jamapsychiatry-e222096-s003.pdf [file jamapsychiatry-e222096-s003.pdf]

## Data Sharing Statement

Bogenschutz. Psilocybin-Assisted Treatment of Alcohol Use Disorder. *JAMA Psychiatry*.  
Published August 24, 2022. doi:10.1001/jamapsychiatry.2022.2096

### Data

**Data available:** Yes

**Data types:** Deidentified participant data, Data dictionary

**How to access data:** Submit requests to the corresponding author for review and approval.

**When available:** With publication

### Supporting Documents

**Document types:** None

### Additional Information

**Who can access the data:** researchers whose proposed use of the data has been approved

**Types of analyses:** Specified approved purposes

**Mechanisms of data availability:** with a signed data access agreement
